# Supplementary material
Source: PubMed Central journal article supplement (PMC2265171)

**A**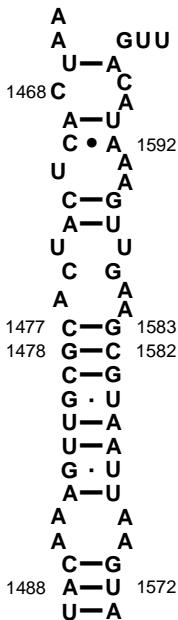

*S. cerevisiae*  
mitochondrion

**B**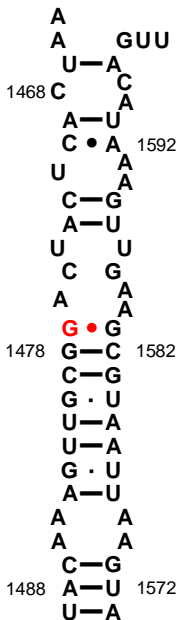

*S. cerevisiae*  
mt C1477G

Supplement: pnas_0707265105_1.pdf [file pnas_0707265105_1.pdf]

**A**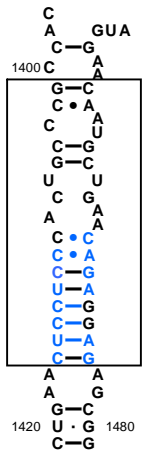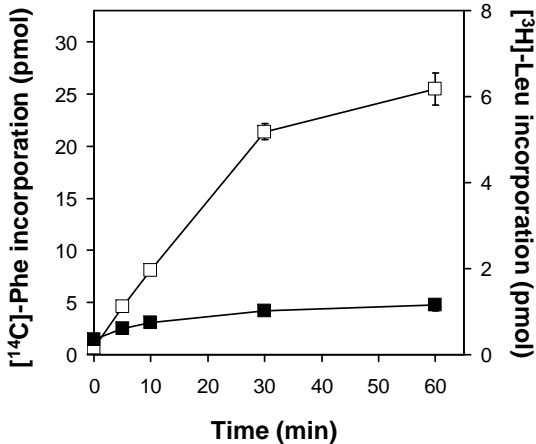**B**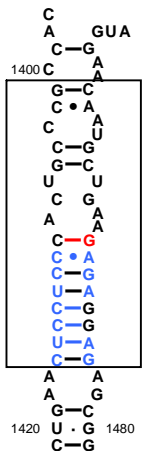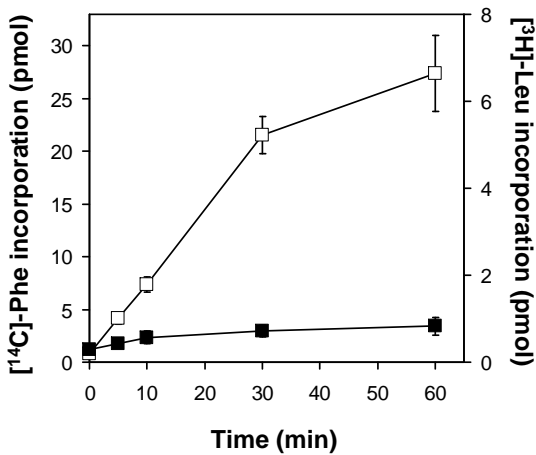

Supplement: pnas_0707265105_3.pdf [file pnas_0707265105_3.pdf]
